# Supplementary material for: An aerobic oxidative synthesis of aryl nitriles and primary aryl amides from benzylic alcohols catalyzed by a polymer supported Cu(ii) complex
Source: Royal Society of Chemistry journal article supplement (doi:10.1039/c4nj01457j), 2014-11-07
Supplement: c4nj01457j1.pdf [file c4nj01457j1.pdf]

## Supporting information

### Aerobic Oxidative Synthesis of Aryl Nitriles and Primary Aryl Amides from Benzylic Alcohols Catalyzed by Polymer Supported Cu (II) Complex

Rostam Ali Molla,<sup>a</sup> Kajari Ghosh,<sup>a</sup> K. Tuhina,<sup>b\*</sup> S. M. Islam,<sup>a,\*</sup>

<sup>a</sup>*Department of Chemistry, University of Kalyani, Kalyani, Nadia 741235, W.B., India.*

<sup>b</sup>*Department of Chemistry, B.S. College, Canning, S-24 PGS, 743329, W.B., India.*

*E-mail: [manir65@rediffmail.com](mailto:manir65@rediffmail.com)*

---

#### NMR Data of nitriles:

**(Table 3, entry 1) benzonitrile:** <sup>1</sup>H NMR (300 MHz, CDCl<sub>3</sub>) δ 7.67–7.54 (m, 3H), 7.45 (t, J = 7.7 Hz, 2H).

**(Table 3, entry 2) 4-Methylbenzonitrile:** <sup>1</sup>H NMR (500 MHz, CDCl<sub>3</sub>) δ 7.48 (d, J = 8.1 Hz, 2H), 7.23 (t, J = 7.1 Hz, 2H), 2.38 (s, 3H).

**(Table 3, entry 3) 2-Methylbenzonitrile:** <sup>1</sup>H NMR (400 MHz, CDCl<sub>3</sub>) δ 7.62–7.57 (m, 1H), 7.48 (td, J = 7.7, 1.4 Hz, 1H), 7.35–7.23 (m, 2H), 2.55 (s, 3H).

**(Table 3, entry 4) 4-Methoxybenzonitrile:** <sup>1</sup>H NMR (400 MHz, CDCl<sub>3</sub>) δ 7.59 (d, J = 8.8 Hz, 2H), 6.95 (d, J = 8.8 Hz, 2H), 3.86 (s, 3H).

**(Table 3, entry 5) 2-Methoxybenzonitrile:** <sup>1</sup>H NMR (400 MHz, CDCl<sub>3</sub>) δ 7.56–7.53 (m, 2H), 7.07–6.91 (m, 2H), 3.93 (s, 3H).

**(Table 3, entry 6) 3-Methoxybenzonitrile:** <sup>1</sup>H NMR (400 MHz, CDCl<sub>3</sub>) δ 7.41–7.34 (m, 1H), 7.28–7.23 (m, 1H), 7.16–7.10 (m, 2H), 3.84 (s, 3H).

**(Table 3, entry 7) 4-Chlorobenzonitrile:** <sup>1</sup>H NMR (400 MHz, CDCl<sub>3</sub>) δ 7.61 (d, J = 8.2 Hz, 2H), 7.47 (d, J = 8.2 Hz, 2H).

**(Table 3, entry 8) 2-Chlorobenzonitrile:** <sup>1</sup>H NMR (300 MHz, CDCl<sub>3</sub>) δ 7.67 (dd, J = 7.7, 1.6 Hz, 1H), 7.61–7.48 (m, 2H), 7.39 (td, J = 7.4, 1.6 Hz, 1H).

**(Table 3, entry 9) 3-Chlorobenzonitrile:** <sup>1</sup>H NMR (400 MHz, CDCl<sub>3</sub>) δ 7.64 (t, J = 1.8 Hz, 1H), 7.62–7.54 (m, 2H), 7.44 (t, J = 7.9 Hz, 1H).

**(Table 3, entry 10) 4-Bromobenzonitrile:** <sup>1</sup>H NMR (400 MHz, CDCl<sub>3</sub>) δ 7.64 (d, J = 8.5 Hz, 2H), 7.53 (d, J = 8.5 Hz, 2H).

(Table 3, entry 11) **2-Nitrobenzonitrile**:  $^1\text{H}$  NMR (500 MHz,  $\text{CDCl}_3$ )  $\delta$  8.41–8.33 (m, 1H), 7.97 (dt,  $J = 7.6, 3.8$  Hz, 1H), 7.95–7.87 (m, 2H).

(Table 3, entry 12) **4-Trifluorobenzonitrile**:  $^1\text{H}$  NMR (400 MHz,  $\text{CDCl}_3$ )  $\delta$  7.82 (d,  $J = 8.3$  Hz, 2H), 7.77 (d,  $J = 8.3$  Hz, 2H).

(Table 3, entry 13) **2-(Benzyloxy)benzonitrile**:  $^1\text{H}$  NMR (300 MHz,  $\text{CDCl}_3$ )  $\delta$  7.59–7.24 (m, 7H), 7.05–6.88 (m, 2H), 5.14 (s, 2H).

(Table 3, entry 14) **Nicotinonitrile**:  $^1\text{H}$  NMR (300 MHz,  $\text{CDCl}_3$ )  $\delta$  8.96–8.89 (m, 1H), 8.85 (dd,  $J = 5.0, 1.6$  Hz, 1H), 8.01 (dt,  $J = 8.0, 1.9$  Hz, 1H), 7.48 (ddd,  $J = 7.9, 5.0, 0.8$  Hz, 1H).

(Table 3, entry 15) **Thiophene-3-carbonitrile**:  $^1\text{H}$  NMR (500 MHz,  $\text{CDCl}_3$ )  $\delta$  7.93 (s, 1H), 7.42 (s, 1H), 7.29 (d,  $J = 4.1$  Hz, 1H).

(Table 3, entry 16) **2-Furonitrile**:  $^1\text{H}$  NMR (400 MHz,  $\text{CDCl}_3$ )  $\delta$  7.60 (d,  $J = 1.7$  Hz, 1H), 7.11 (d,  $J = 3.6$  Hz, 1H), 6.54 (dd,  $J = 3.6, 1.8$  Hz, 1H).

(Table 3, entry 17) **1-Naphthonitrile**:  $^1\text{H}$  NMR (500 MHz,  $\text{CDCl}_3$ )  $\delta$  8.23 (dd,  $J = 8.4, 1.0$  Hz, 1H), 8.09–8.05 (m, 1H), 7.94–7.87 (m, 2H), 7.68 (ddd,  $J = 8.4, 6.9, 1.3$  Hz, 1H), 7.61 (ddd,  $J = 8.2, 6.9, 1.2$  Hz, 1H), 7.51 (dd,  $J = 8.3, 7.1$  Hz, 1H).

(Table 3, entry 18) **Cinnamonitrile**:  $^1\text{H}$  NMR (300 MHz,  $\text{CDCl}_3$ )  $\delta$  7.50–7.19 (m, 6H), 5.84 (d,  $J = 16.7$  Hz, 1H).

(Table 3, entry 19) **1,3-Dicyanobenzene**:  $^1\text{H}$  NMR (400 MHz,  $\text{CDCl}_3$ )  $\delta$  7.97 (t,  $J = 1.6$  Hz, 1H), 7.91 (dd,  $J = 8.0, 1.6$  Hz, 2H), 7.66 (t,  $J = 7.9$  Hz, 1H).

(Table 3, entry 20) **3-Phenylpropionitril**:  $^1\text{H}$  NMR (400 MHz,  $\text{CDCl}_3$ )  $\delta$  7.56–7.06 (m, 5H), 2.95 (t,  $J = 7.4$  Hz, 2H), 2.61 (t,  $J = 7.4$  Hz, 2H).

(Table 3, entry 21) **Octanenitrile**:  $^1\text{H}$  NMR (400 MHz,  $\text{CDCl}_3$ )  $\delta$  2.34 (t,  $J = 7.1$  Hz, 2H), 1.66 (p,  $J = 7.2$  Hz, 2H), 1.50–1.39 (m, 2H), 1.37–1.24 (m, 6H), 0.89 (t,  $J = 6.7$  Hz, 3H).

### **NMR Data of Amides:**

(Table 4, entry 1) **Benzamide**:  $^1\text{H}$  NMR (300 MHz,  $\text{DMSO-d}_6$ ):  $\delta = 7.40$  (s, 1H), 7.47–7.59 (m, 3H), 7.92–7.95 (m, 2H), 8.10 (s, 1H).

(Table 4, entry 2) **2-Methylbenzamide**:  $^1\text{H}$  NMR (300 MHz,  $\text{DMSO-d}_6$ ):  $\delta = 2.67$  (s, 3H), 7.32–7.52 (m, 2H), 7.64–7.65 (m, 2H), 8.32–8.44 (m, 2H).

(Table 4, entry 3) **3-Methylbenzamide**:  $^1\text{H}$  NMR (300 MHz,  $\text{DMSO-d}_6$ ):  $\delta = 2.37$  (s, 3H), 7.32–7.39 (m, 2H), 7.67–7.73 (m, 2H), 7.95 (s, 1H), 8.00–8.05 (m, 1H).

(Table 4, entry 4) **4-Methylbenzamide**:  $^1\text{H}$  NMR (300 MHz,  $\text{DMSO-d}_6$ ):  $\delta = 2.36$  (s, 3H), 7.27 (d,  $J = 8.23$  Hz, 2H), 7.34 (s, 1H), 7.83 (d,  $J = 8.23$  Hz, 2H), 7.96 (s, 1H).

(Table 4, entry 5) 4-Methoxybenzamide:  $^1\text{H}$  NMR (300 MHz, DMSO- $d_6$ ):  $\delta$  = 3.38 (s, 1H), 3.87 (s, 3H), 7.04 (d,  $J$  = 9.18 Hz, 2H), 7.92 (d,  $J$  = 9.18 Hz, 2H), 12.6 (s, 1H);

(Table 4, entry 6) 4-(Thiomethyl)benzamide  $^1\text{H}$  NMR (300 MHz, DMSO- $d_6$ ):  $\delta$  = 3.31 (s, 3H), 7.70 (s, 1H), 8.01-8.09 (m, 2H), 8.10-8.16 (m, 2H), 8.25 (s, 1H).

(Table 4, entry 7) 2-Chlorobenzamide  $^1\text{H}$  NMR (300 MHz, DMSO- $d_6$ ):  $\delta$  = 6.83-8.13 (m, 6H).

(Table 4, entry 8) 3-Chlorobenzamide  $^1\text{H}$  NMR (300 MHz, DMSO- $d_6$ ):  $\delta$  = 7.50-7.55 (m, 1H), 7.57 (s, 1H, NH<sub>2</sub>), 7.60-7.64 (m, 1H), 7.85-7.89 (m, 1H), 7.94-7.96 (m, 1H), 8.12 (s, 1H).

(Table 4, entry 9) 4-Chlorobenzamide  $^1\text{H}$  NMR (300 MHz, DMSO- $d_6$ ):  $\delta$  = 7.49 (s, 1H), 7.54-7.58 (m, 2H), 7.91-7.95 (m, 2H), 8.08 (s, 1H).

(Table 4, entry 10) 4-Fluorobenzamide  $^1\text{H}$  NMR (300 MHz, DMSO- $d_6$ ):  $\delta$  = 7.29-7.35 (m, 2H), 7.43 (s, 1H), 7.96-8.00 (m, 2H), 8.03 (s, 1H).

(Table 4, entry 11) 4-(Trifluoromethyl)benzamide  $^1\text{H}$  NMR (300 MHz, DMSO- $d_6$ ):  $\delta$  = 7.69 (s, 1H), 7.85-7.89 (m, 2H), 8.10-8.13 (m, 2H), 8.26 (s, 1H).

(Table 4, entry 12) 4-(Trifluoromethoxy)benzamide  $^1\text{H}$  NMR (300 MHz, DMSO- $d_6$ ):  $\delta$  = 7.43-7.49 (m, 2H), 7.58 (s, 1H), 8.03-8.08 (m, 2H), 8.16 (s, 1H).

(Table 4, entry 13) 4-Nitrobenzamide:  $^1\text{H}$  NMR (400 MHz, DMSO- $d_6$ , 25  $^\circ\text{C}$ ):  $\delta$  = 8.37-8.21 (3H, m), 8.11 (2H, d), 7.73 (1H, br. s).

(Table 4, entry 14) 4-Bromobenzamide  $^1\text{H}$  NMR (300 MHz, DMSO- $d_6$ ):  $\delta$  = 7.53 (s, 1H), 7.66-7.71 (m, 2H), 7.83-7.89 (m, 2H), 8.10 (s, 1H).

(Table 4, entry 15) Picolinamide  $^1\text{H}$  NMR (300 MHz, DMSO- $d_6$ ):  $\delta$  = 7.58-7.62 (m, 1H), 7.71 (s, 1H), 7.98-8.03 (m, 1H), 8.07 (s, 1H, NH<sub>2</sub>), 8.07-8.09 (m, 1H), 8.17 (s, 1H), 8.64-8.66 (m, 1H).

(Table 4, entry 16) Nicotinamide  $^1\text{H}$  NMR (300 MHz, DMSO- $d_6$ ):  $\delta$  = 7.48-7.53 (m, 1H), 7.69 (s, 1H), 8.24-8.30 (m, 2H), 8.71-8.76 (m, 2H).

(Table 4, entry 17) Pyridine-4-carboxamide  $^1\text{H}$  NMR (400 MHz, DMSO- $d_6$ , 25  $^\circ\text{C}$ ):  $\delta$  = 8.43 (2H, d), 7.93 (2H, d), 5.95 (2H, br. s).

(Table 4, entry 18) Thiophene-2-carboxamide  $^1\text{H}$  NMR (300 MHz, DMSO- $d_6$ ):  $\delta$  = 7.15-7.17 (m, 3H), 7.40 (s, 1H), 7.76-7.79 (m, 2H), 7.99 (s, 1H).

(Table 4, entry 19) Furan-2-carboxamide:  $^1\text{H}$  NMR (300 MHz,  $\text{CDCl}_3$ )  $\delta$  7.48-7.43 (m, 1H), 7.14 (d,  $J$  = 3.5 Hz, 1H), 6.50 (dd,  $J$  = 3.4, 1.7 Hz, 1H), 6.37 (s, br, 2H).

**(Table 4, entry 20) Cinnamamide:**  $^1\text{H}$  NMR (500 MHz,  $\text{CDCl}_3$ )  $\delta$  7.63 (d,  $J = 15.7$  Hz, 1H), 7.54–7.49 (m, 2H), 7.37 (dd,  $J = 10.1, 5.7$  Hz, 3H), 6.48 (d,  $J = 15.7$  Hz, 1H), 5.90 (s, br, 2H).
